# Supplementary material for: Hierarchical Co(OH)F/CoFe-LDH heterojunction enabling high-performance overall water-splitting
Source: Royal Society of Chemistry journal article supplement (doi:10.1039/d2ce00817c), 2022-01-01
Supplement: d2ce00817c1.pdf [file d2ce00817c1.pdf]

## Supporting Information

### Hierarchical Co(OH)F/CoFe-LDH heterojunction enabling high-performance overall water-splitting

Mingliang Qin <sup>a</sup>, Yamei Wang <sup>a</sup>, Huaming Zhang <sup>a, c\*</sup>, Muhammad Humayun <sup>b</sup>, Xuefei Xu <sup>b</sup>,

Yanjun Fu <sup>a, c</sup>, Marsil K. Kadirov <sup>d</sup>, Chundong Wang <sup>b\*</sup>

<sup>a</sup> Key Laboratory of Opto-Electronic Information Science and Technology of Jiangxi Province, Nanchang Hangkong University, Nanchang, 330063, Jiangxi, P. R. China.

<sup>b</sup> School of Optical and Electronic Information, Wuhan National Laboratory for Optoelectronics, Huazhong University of Science and Technology, Wuhan 430074, P.R. China

<sup>c</sup> Jiangxi Engineering Laboratory for Optoelectronics Testing Technology, Nanchang Hangkong University, Nanchang, 330063, Jiangxi, P. R. China.

<sup>d</sup> A.E. Arbuzov Institute of Organic and Physical Chemistry, Kazan Scientific Center, Russian Academy of Sciences, 8, Akad. Arbuzov Str., Kazan 420088, Russia.

---

\* Corresponding author [70451@nchu.edu.cn](mailto:70451@nchu.edu.cn) (H.M. Zhang); [apcdwang@hust.edu.cn](mailto:apcdwang@hust.edu.cn) (C.D. Wang)

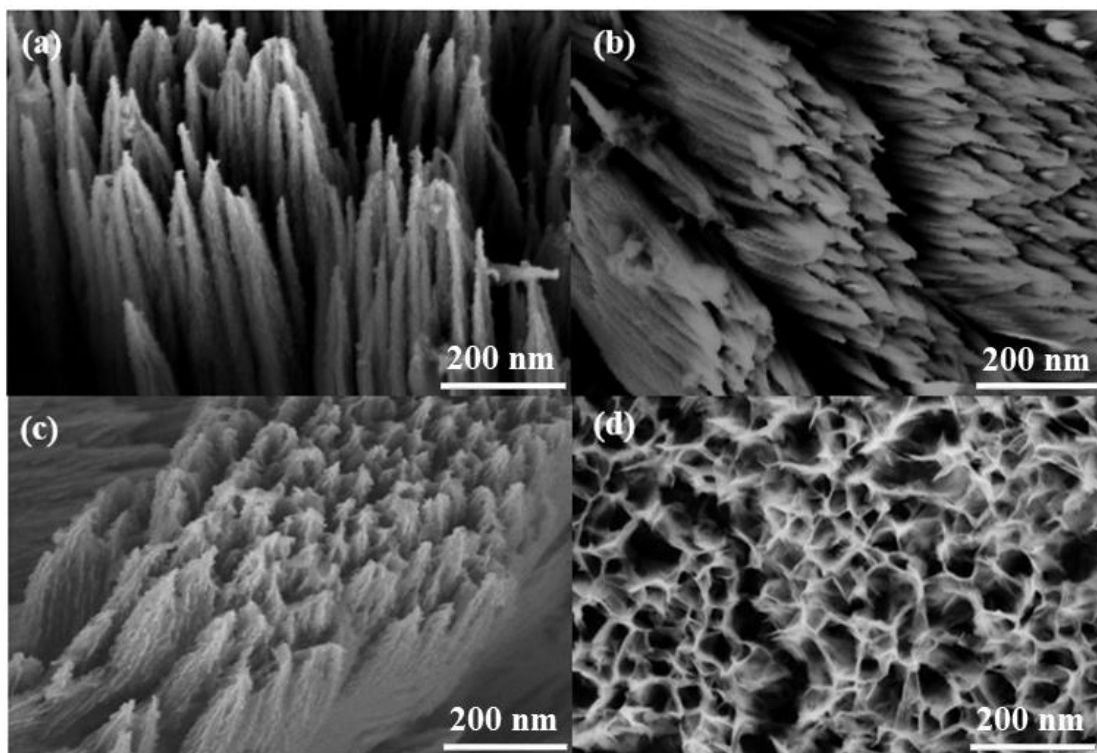

**Figure. S1.** SEM images of CoFe-LDH on Co(OH)F under different electrodeposition times. (a) 10 s; (b) 20 s; (c) 40 s; (d) 60 s.

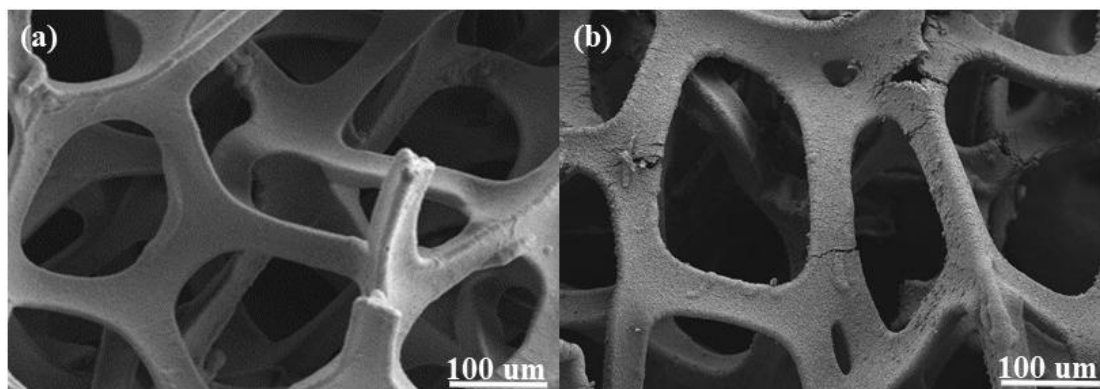

**Figure. S2.** (a) SEM image of bare NF after removing the oxide layer with 3 M HCl treatment. (b) SEM image of NF surface covered by Co(OH)F @CoFe-LDH.

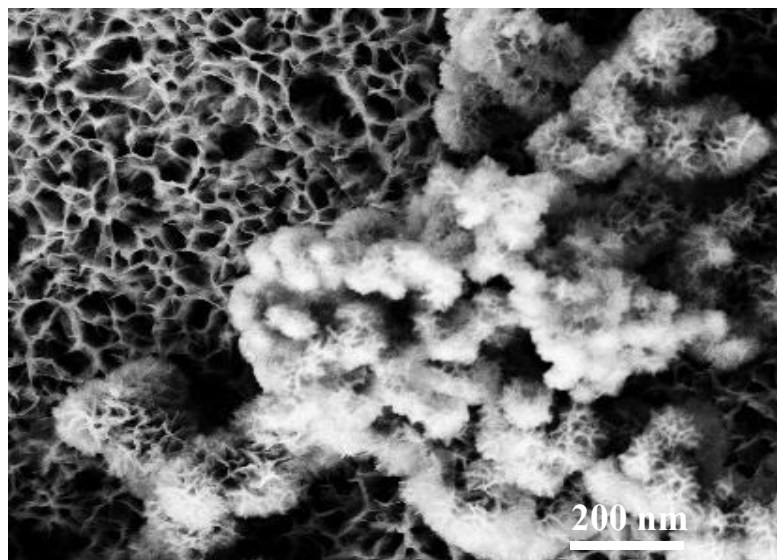

**Figure. S3.** SEM image of the CoFe-LDH

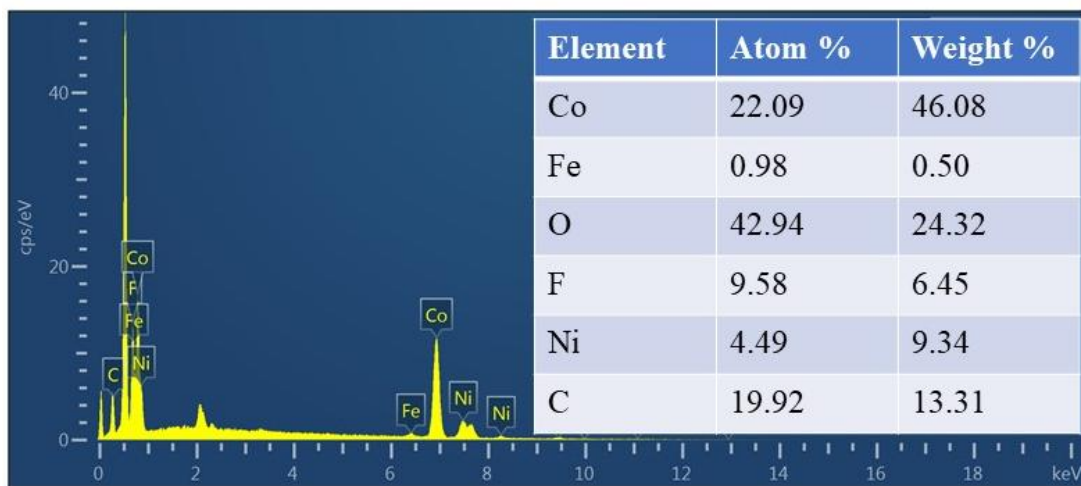

**Figure. S4.** EDS spectrum of Co(OH)F@CoFe-LDH.

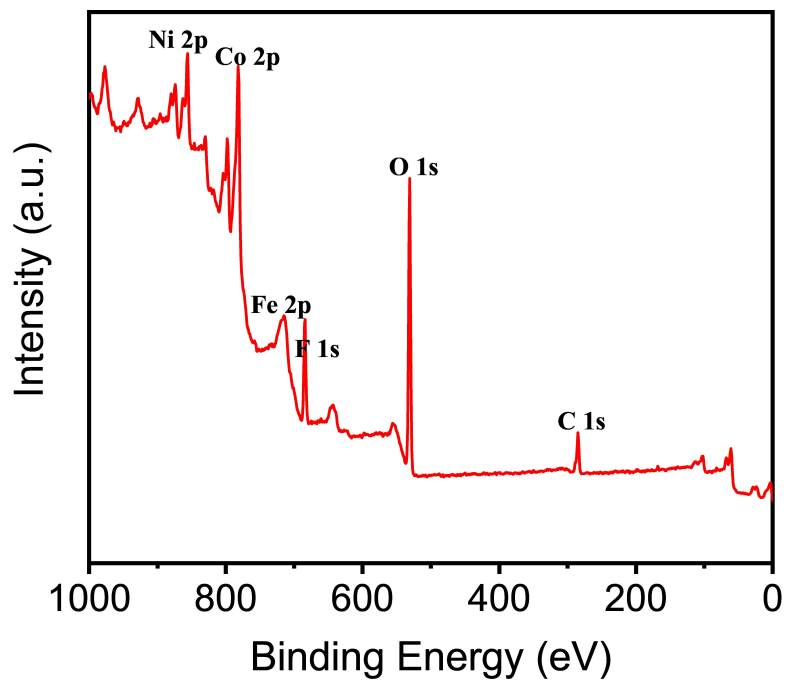

**Figure. S5.** XPS survey spectrum of Co(OH)F@CoFe-LDH

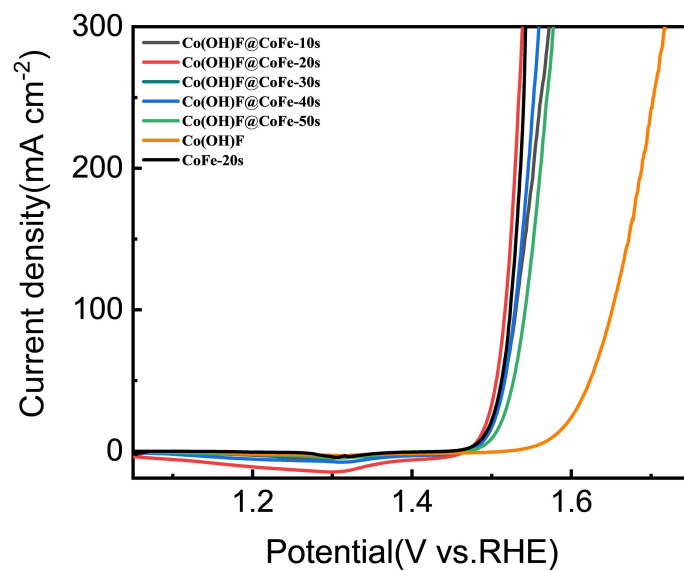

**Figure. S6.** Polarization curves of different Co(OH)F@CoFe-LDH samples prepared with different electrodeposition times for OER.

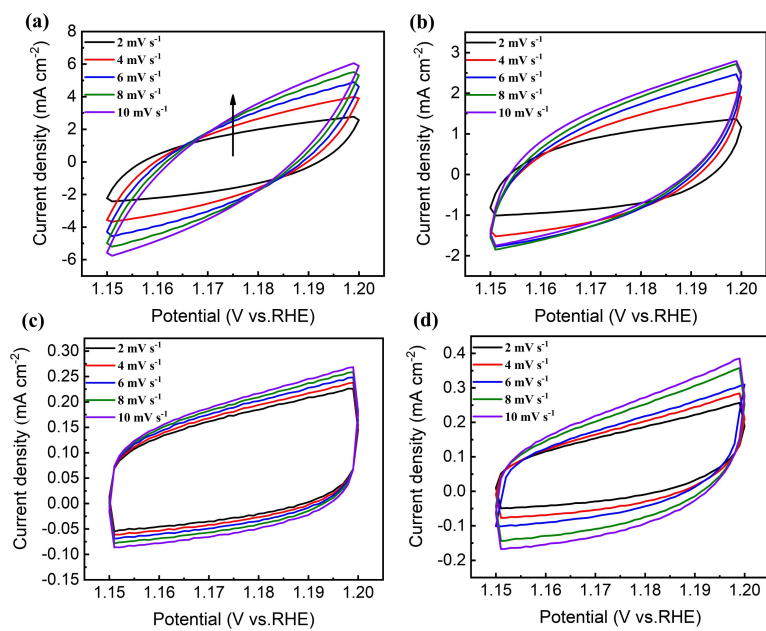

**Figure. S7.** CV curves of the catalysts recorded in the region of 1.15-1.20 V. (a) Co(OH)F@CoFe-LDH, (b) Co(OH)F, (c) NF, (d) CoFe-LDH.



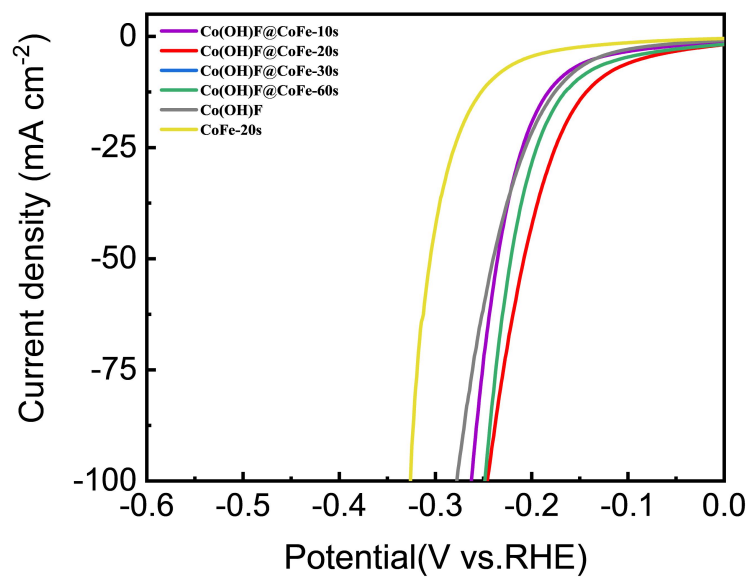

**Figure. S8.** Polarization curves of different Co(OH)F@CoFe-LDH samples prepared with different electrodeposition times for HER

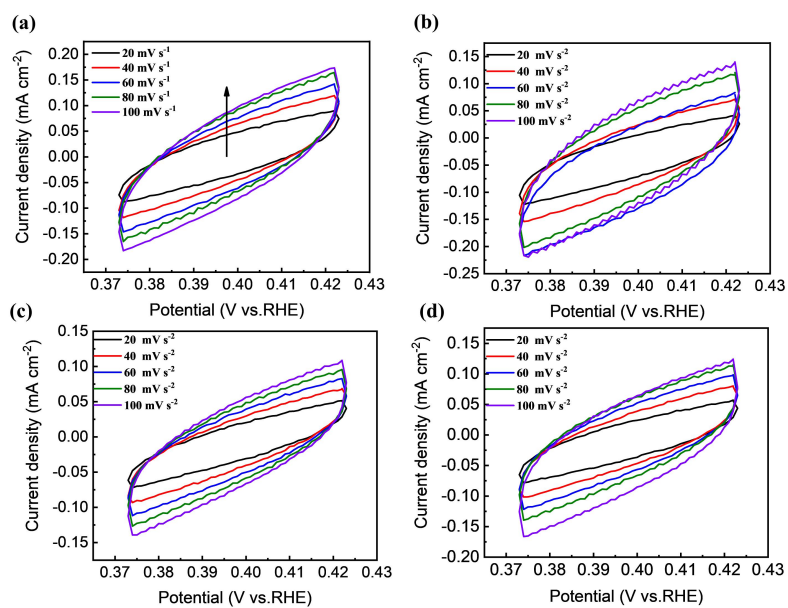

**Figure. S9.** CV curves of the catalysts recorded in the region of 0.37-0.42 V. (a) Co(OH)F@CoFe-LDH, (b) Co(OH)F, (c) NF, (d) CoFe-LDH.

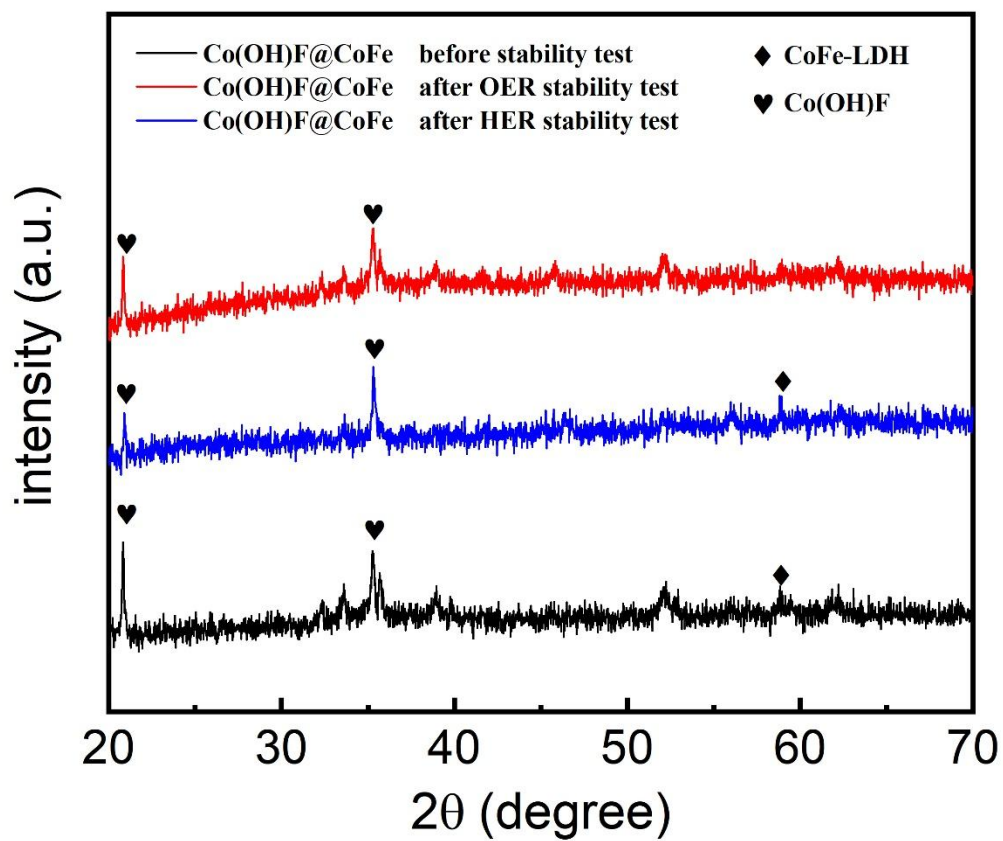

**Figure. S10.** XRD spectra of the Co(OH)F@CoFe-LDH before and after OER and HER stability tests

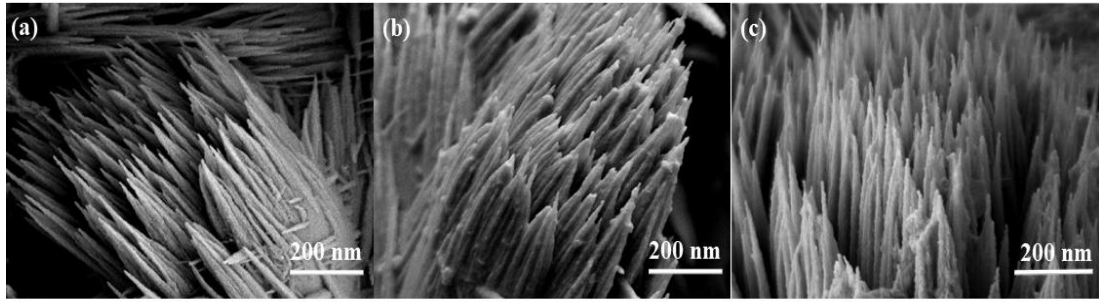

**Figure. S11.** (a) SEM images of Co(OH)F@CoFe-LDH before stability tests. (b) SEM images of Co(OH)F@CoFe-LDH after stability tests (OER). (c) SEM images of Co(OH)F@CoFe-LDH after stability tests (HER)

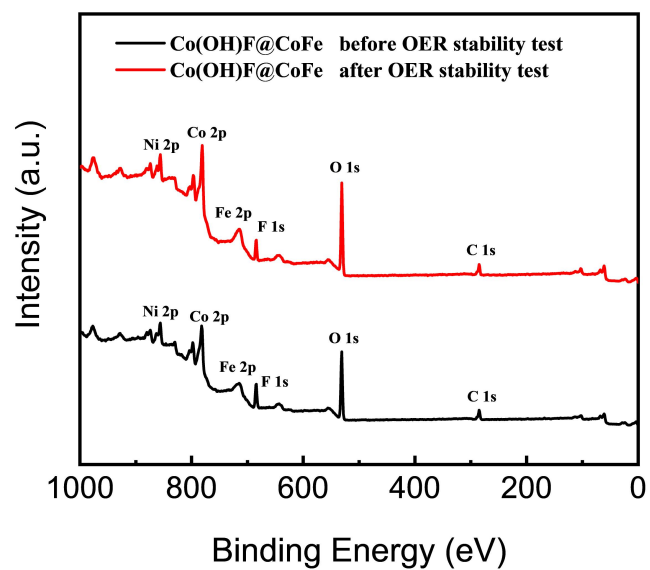

**Figure. S12.** XPS survey of Co(OH)F@CoFe-LDH before and after stability tests

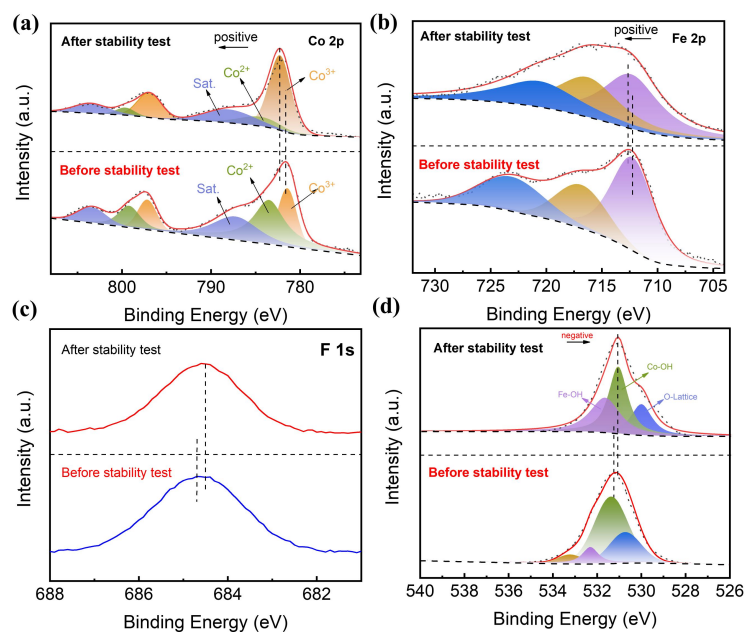

**Figure. S13.** high-resolution XPS spectra of (a) Co 2p, (b) Fe 2p, (c) F 1s and (d) O 1s of Co(OH)F@CoFe-LDH before and after stability tests.

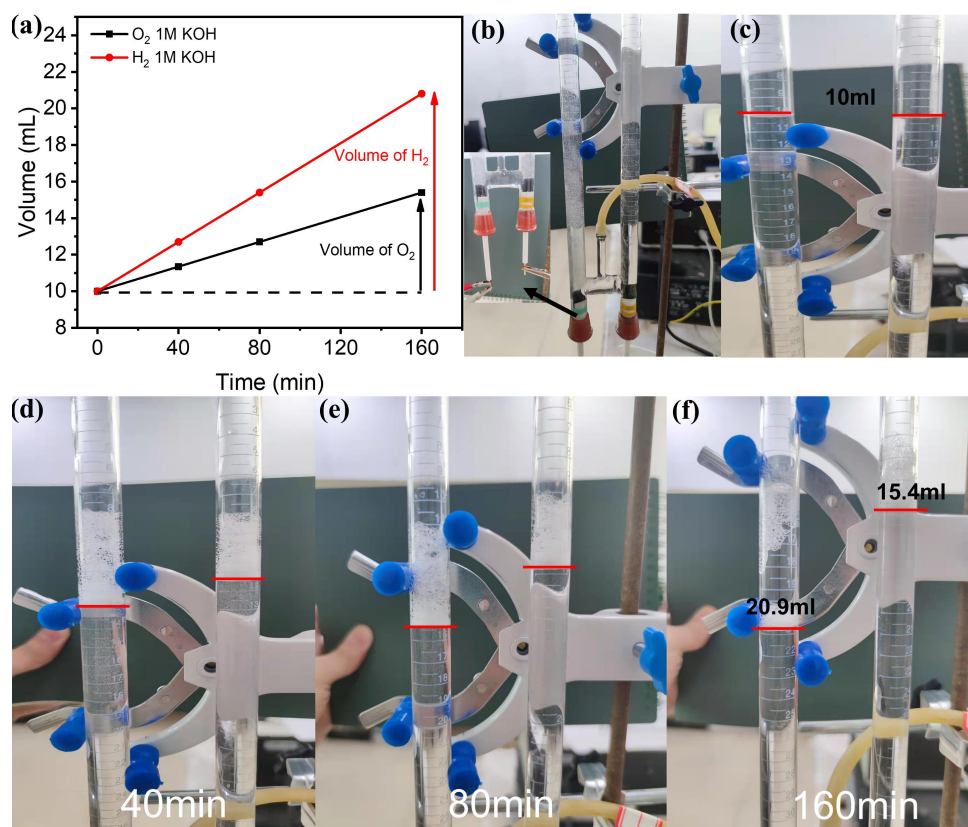

**Fig. S14.** (a) Diagram of the amount of H<sub>2</sub> and O<sub>2</sub> released over time in 1 M KOH. (b) Device diagram for measuring Faraday efficiency. (c-f) Corresponding levels of H<sub>2</sub> and O<sub>2</sub> gases generated at different times 1 M KOH electrolyzer.

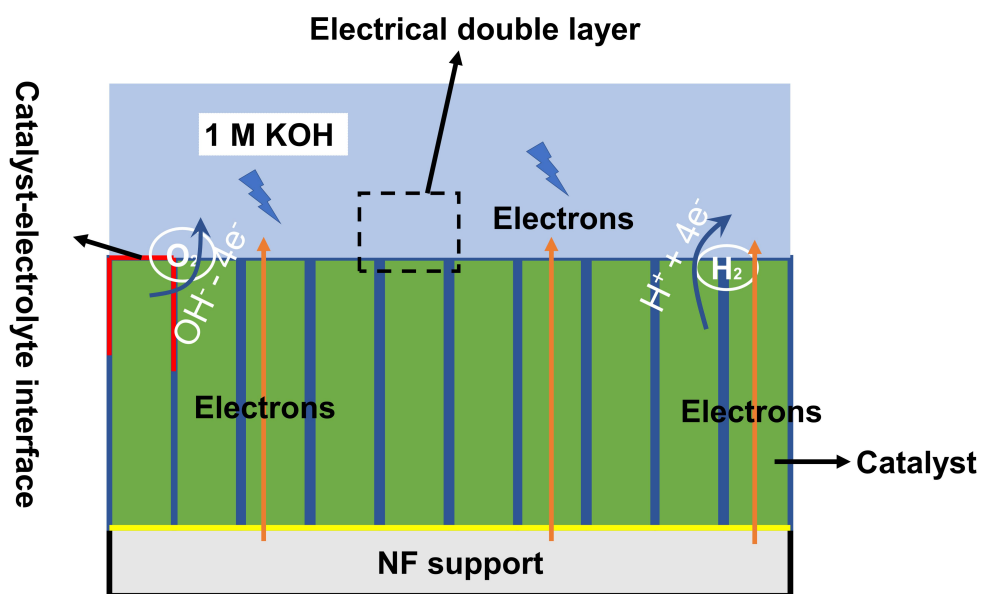

**Fig. S15.** Schematic illustration of the electrocatalytic HER and OER in 1M KOH solution.



**Table S1.** ICP-MS results of catalysts

| Catalysts        | ICP-MS (wt %) |     |              |
|------------------|---------------|-----|--------------|
|                  | Co            | Fe  | Co: Fe (at.) |
| Co(OH)F@CoFe-LDH | 51.29         | 1.2 | 42.7:1       |
| CoFe-LDH         | 23.58         | 6.7 | 3.4:1        |

**Table. S2.** Electrocatalytic activity of OER, HER and overall water splitting for the reported various electrocatalysts in 1 M KOH at the current density of  $j$  mA/cm<sup>2</sup>.

| Catalysts                                              | HER                                     |                      | OER                                     |                      | Overall water splitting                | References |
|--------------------------------------------------------|-----------------------------------------|----------------------|-----------------------------------------|----------------------|----------------------------------------|------------|
|                                                        | $\eta$ (mV) @ $j$ (mA/cm <sup>2</sup> ) | Tafel Slope (mV/dec) | $\eta$ (mV) @ $j$ (mA/cm <sup>2</sup> ) | Tafel Slope (mV/dec) | $\eta$ (V) @ $j$ (mA/cm <sup>2</sup> ) |            |
| Co(OH)F@CoFe-LDH/NF                                    | 130@10                                  | 82.9                 | 240@10                                  | 25.4                 | 1.58@10                                | This work  |
|                                                        | 208@50                                  | 82.9                 | 262@50                                  | 25.4                 | 1.67@50                                |            |
|                                                        | 245@100                                 | 82.9                 | 274@100                                 | 25.4                 | 1.7@100                                |            |
| CoFe@NiFe-200/NF                                       | 240@10                                  | 84.69                | 190@10                                  | 45.71                | 1.59@10                                | [1]        |
| NiFe LDH-NiSe/NF                                       | 276@100                                 | 70                   | 240@100                                 | 65.6                 | 1.53@10                                | [2]        |
| NiCo <sub>2</sub> S <sub>4</sub> @NiFe-LDH             | 200@10                                  | 46.3                 | 201@60                                  | 101.1                | 1.6@10                                 | [3]        |
| Co <sub>3</sub> S <sub>4</sub> @MoS <sub>2</sub>       | 210@10                                  | 88                   | 330@10                                  | 59                   | ---                                    | [4]        |
| Ni <sub>3</sub> S <sub>2</sub> -CoMoS <sub>x</sub> /NF | 234@10                                  | 125                  | 90@10                                   | 75                   | 1.49@10                                | [5]        |
| FeS/NiS/NF                                             | 144@10                                  | 120                  | 203@10                                  | 39                   | 1.618@10                               | [6]        |
| Cu@CoFe-LDH                                            | 171@10                                  | 36.4                 | 240@10                                  | 44.4                 | 1.681@10                               | [7]        |
| NiFe-LDH-Co <sub>3</sub> O <sub>4</sub>                | 162@10                                  | 105                  | 214@10                                  | 30                   | 1.64@10                                | [8]        |
| NiCo <sub>2</sub> O <sub>4</sub> @NiO@Ni               | 124@10                                  | 58                   | 240@10                                  | 43                   | 1.6@10                                 | [9]        |
| CoS-Co(OH) <sub>2</sub> @aMoS <sub>2+x</sub>           | 143@10                                  | 68                   | 380@10                                  | 68                   | 1.58@10                                | [10]       |

## References

- [1] A. Karmakar, K. Karthick, S.S. Sankar, S. Kumaravel, R. Madhu, S. Kundu, A vast exploration of improvising synthetic strategies for enhancing the OER kinetics of LDH structures: a review, *J. Mater. Chem. A*, 2021, **9**, 1314.
- [2] S. Dutta, A. Indra, Y. Feng, T. Song, U. Paik, Self-Supported Nickel Iron Layered Double Hydroxide-Nickel Selenide Electrocatalyst for Superior Water Splitting Activity, *ACS Appl. Mater. Interfaces*, 2017, **9**, 33766.
- [3] X. Feng, Q. Jiao, W. Chen, Y. Dang, Z. Dai, S.L. Suib, J. Zhang, Y. Zhao, H. Li, C. Feng, Cactus-like NiCo<sub>2</sub>S<sub>4</sub>@NiFe LDH hollow spheres as an effective oxygen bifunctional electrocatalyst in alkaline solution, *Appl. Catal. B Environ.*, 2021, **286**, 119869.
- [4] Y. Guo, J. Tang, H. Qian, Z. Wang, Y. Yamauchi, One-Pot Synthesis of Zeolitic Imidazolate Framework 67-Derived Hollow Co<sub>3</sub>S<sub>4</sub>@MoS<sub>2</sub> Heterostructures as Efficient Bifunctional Catalysts, *Chem. Mater.*, 2017, **29**, 5566.
- [5] L. Zhao, H. Ge, G. Zhang, F. Wang, G. Li, Hierarchical Ni<sub>3</sub>S<sub>2</sub>-CoMoS<sub>x</sub> on the nickel foam as an advanced electrocatalyst for overall water splitting, *Electrochimica Acta*, 2021, **387**, 138538.
- [6] R. Zhang, Z. Zhu, J. Lin, K. Zhang, N. Li, C. Zhao, Hydrolysis assisted in-situ growth of 3D hierarchical FeS/NiS/nickel foam electrode for overall water splitting, *Electrochim. Acta*, 2020, **332**, 135534.
- [7] L. Yu, H. Zhou, J. Sun, F. Qin, D. Luo, L. Xie, F. Yu, J. Bao, Y. Li, Y. Yu, S. Chen, Z. Ren, Hierarchical Cu@CoFe layered double hydroxide core-shell nanoarchitectures as bifunctional electrocatalysts for efficient overall water splitting, *Nano Energy*, 2017, **41**, 327.
- [8] J. Wang, Y.F. Song, Synchronous Electrocatalytic Design of Architectural and Electronic Structure Based on Bifunctional LDH-Co<sub>3</sub>O<sub>4</sub> /NF toward Water Splitting, *Chemistry*, 2021, **27**,

3367.

[9] L. Wang, C. Gu, X. Ge, J. Zhang, H. Zhu, J. Tu, Highly Efficient Bifunctional Catalyst of NiCo<sub>2</sub>O<sub>4</sub>@NiO@Ni Core/Shell Nanocone Array for Stable Overall Water Splitting, *Part. Part. Syst. Char.*, 2017, **34**, 1700228.

[10] T. Yoon, K.S. Kim, One-Step Synthesis of CoS-Doped  $\beta$ -Co(OH)<sub>2</sub>@Amorphous MoS<sub>2+x</sub> Hybrid Catalyst Grown on Nickel Foam for High-Performance Electrochemical Overall Water Splitting, *Adv. Funct. Mater.*, 2016, **26**, 7386.
